# Supplementary material for: Biodegradable organosilica magnetic micelles for magnetically targeted MRI and GSH-triggered tumor chemotherapy
Source: Royal Society of Chemistry journal article supplement (doi:10.1039/c9bm00342h), 2019-01-01
Supplement: c9bm00342h1.pdf [file c9bm00342h1.pdf]

## Supplementary data

### **Biodegradable Organosilica Magnetic Micelles for Magnetic Targeting MRI and GSH-triggered Tumor Chemotherapy**

Tiangang Yang, Dechao Niu,\* Jianzhuang Chen, Jianping He, Shaobo Yang, Xiaobo Jia, Jina Hao, Wenru Zhao and Yongsheng Li,\*

Lab of Low-Dimensional Materials Chemistry, Key Laboratory for Ultrafine Materials of Ministry of Education, School of Materials Science and Engineering, East China University of Science and Technology, Shanghai 200237, China. E-mail: [dcniu@ecust.edu.cn](mailto:dcniu@ecust.edu.cn); [ysli@ecust.edu.cn](mailto:ysli@ecust.edu.cn).

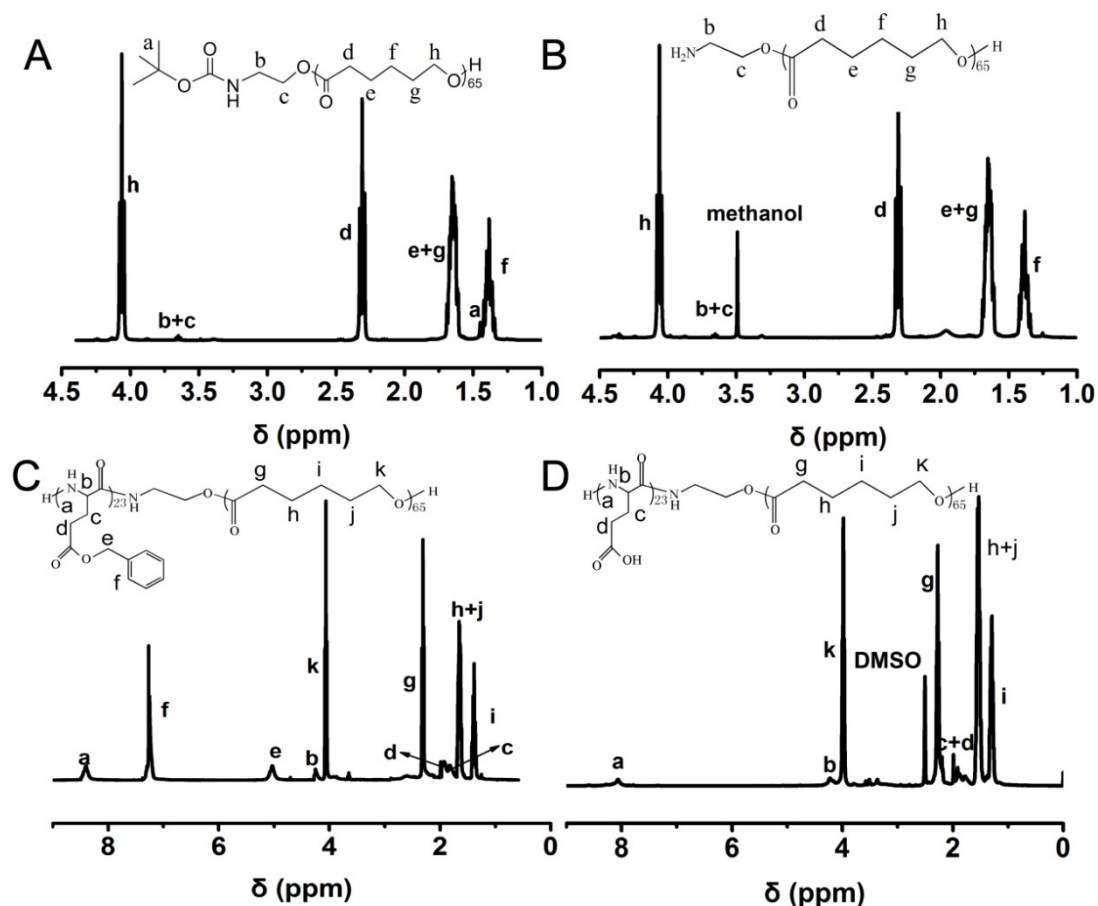

**Fig. S1.**  $^1\text{H}$  NMR spectra of (A) PCL<sub>65</sub>-NH-Boc in CDCl<sub>3</sub>, (B) PCL<sub>65</sub>-NH<sub>2</sub> in CDCl<sub>3</sub> (C) PCL<sub>65</sub>-b-PBLG<sub>23</sub> in DMSO-*d*<sub>6</sub> and (D) PCL<sub>65</sub>-b-PGA<sub>23</sub> in DMSO-*d*<sub>6</sub>.

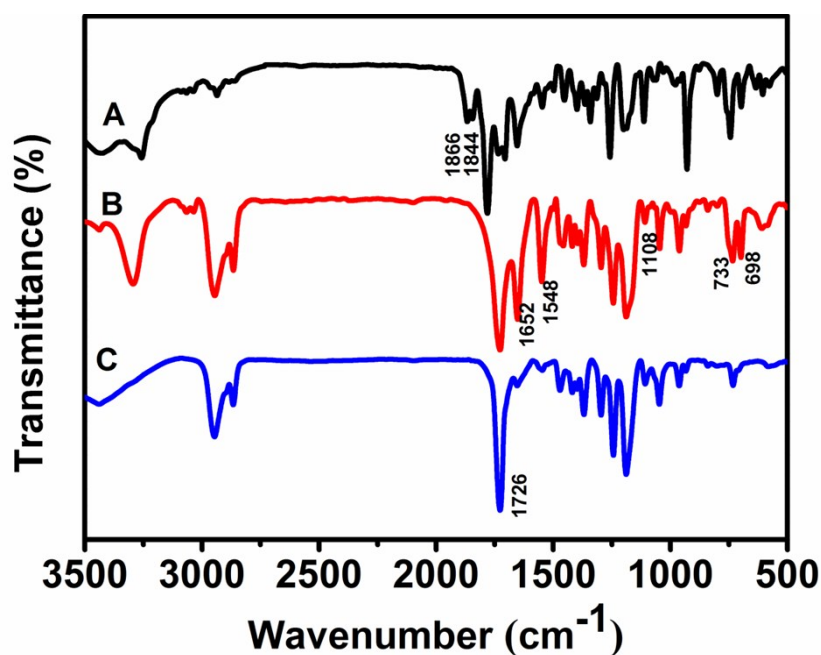

**Fig. S2.** FT-IR spectra of (A) Bz-Glu NCA, (B) PCL<sub>65</sub>-b-PBLG<sub>23</sub> and (C) PCL<sub>65</sub>-b-PGA<sub>23</sub>.

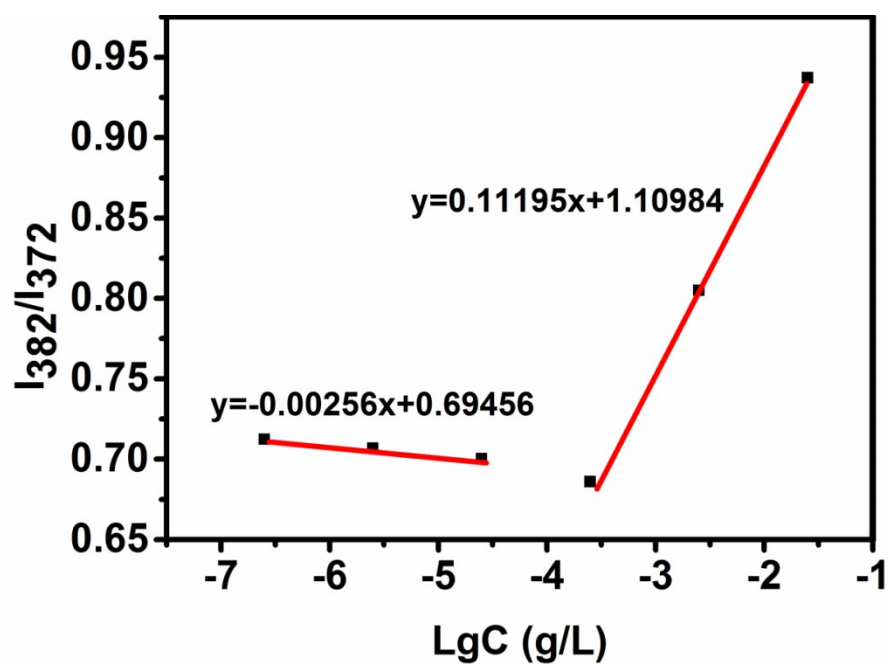

**Fig. S3.** The critical micelle concentration (CMC) of PCL<sub>65</sub>-*b*-PGA<sub>23</sub>.

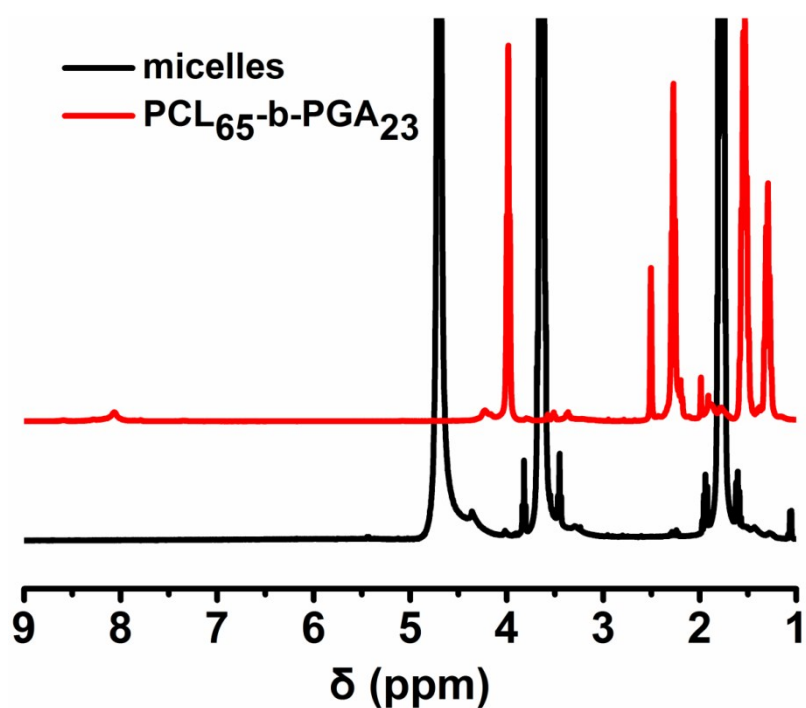

**Fig. S4.** <sup>1</sup>H NMR spectra of PCL<sub>65</sub>-*b*-PGA<sub>23</sub> in DMSO-*d*<sub>6</sub> and the micelles self-assembled from PCL<sub>65</sub>-*b*-PGA<sub>23</sub> in D<sub>2</sub>O.

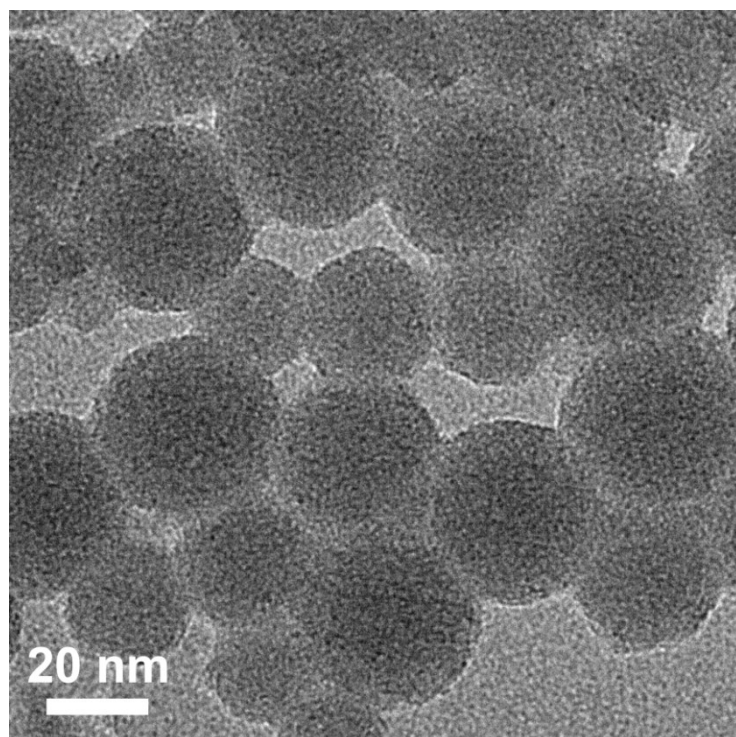

**Fig. S5.** TEM image of organosilica micelles after calcination at 450 °C for 6 h.

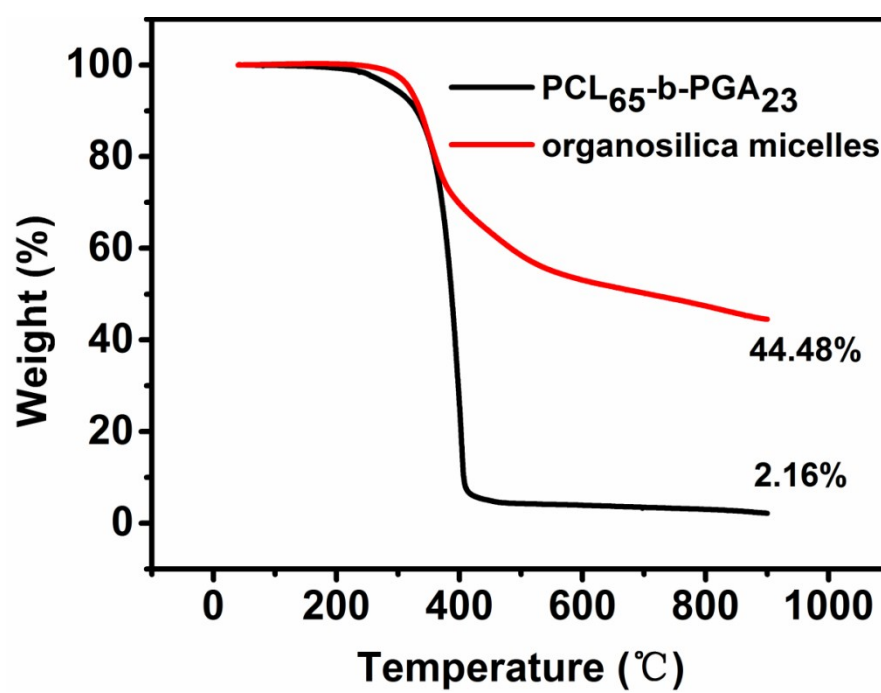

**Fig. S6.** TG curves of PCL<sub>65</sub>-b-PGA<sub>23</sub> and organosilica PCL<sub>65</sub>-b-PGA<sub>23</sub> micelles.

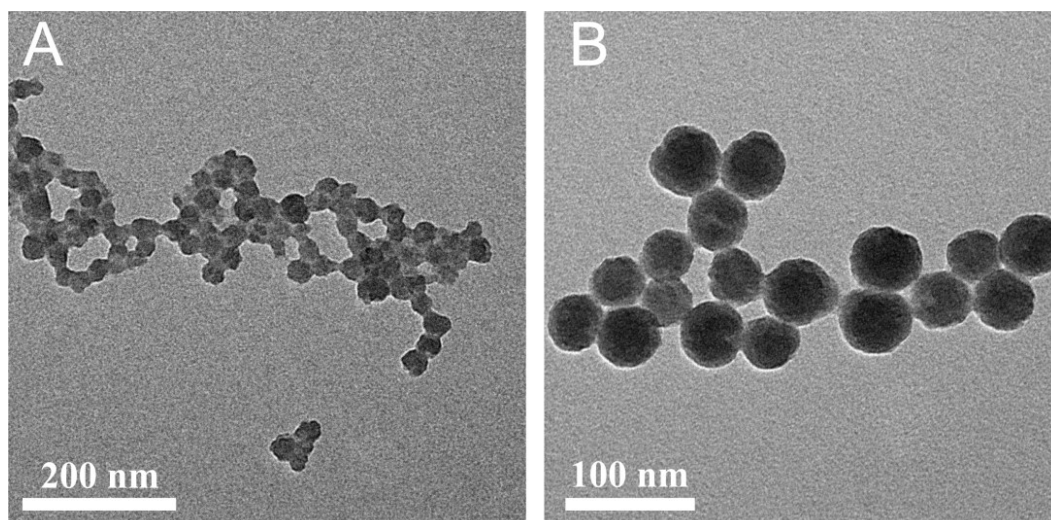

**Fig. S7.** TEM images of organosilica micelles synthesized using different amounts of MPTMS. (A) 50  $\mu\text{L}$  and (B) 150  $\mu\text{L}$ .

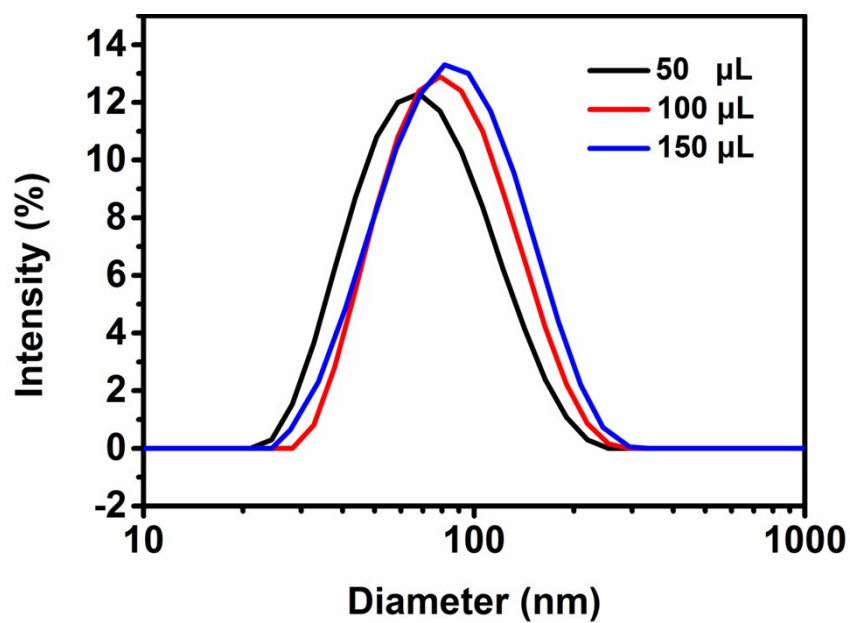

**Fig. S8.** Hydrodynamic size distributions of organosilica micelles prepared with different amounts of MPTMS (measured in water).

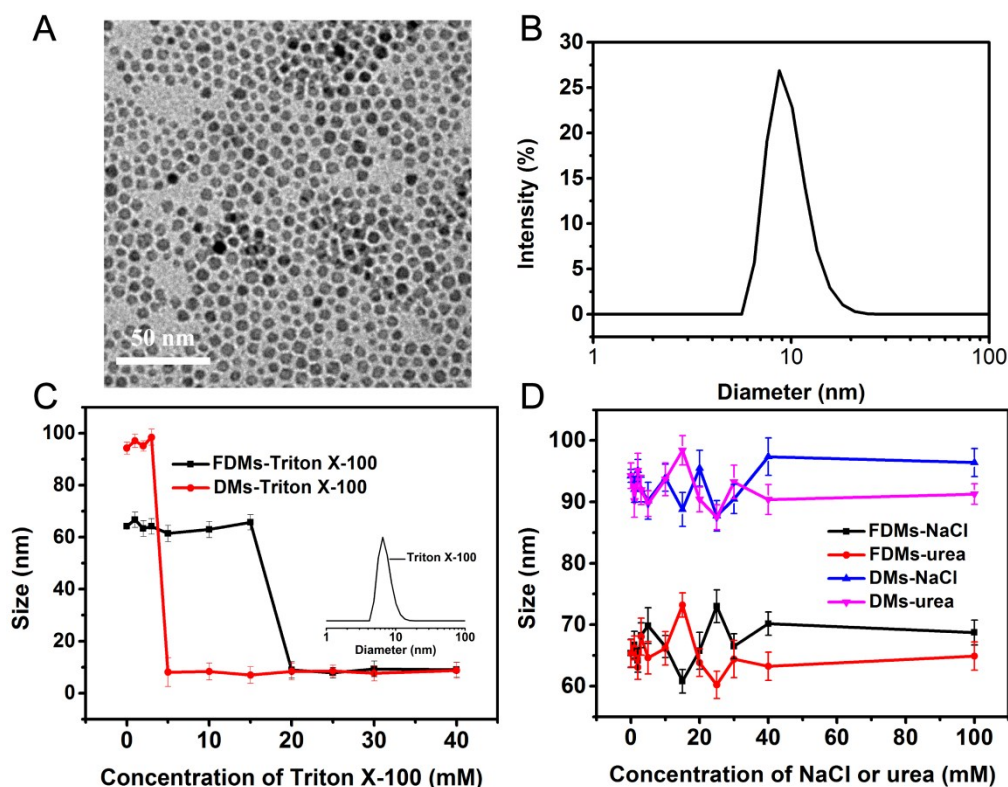

**Fig. S9.** (A) TEM image and (B) size distribution of hydrophobic  $\text{Fe}_3\text{O}_4$  in THF solvent. The size changes of FDMs and DMs in water after treatment with different concentrations of (C) Triton X-100, (D) NaCl and urea, respectively. (The inset in C is the size distribution of Triton X-100 micelles self-assembled in  $\text{H}_2\text{O}$ ).

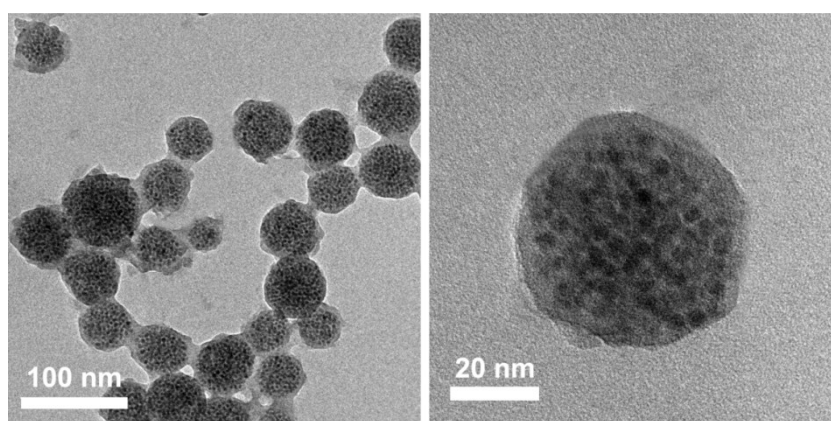

**Fig. S10.** TEM images of FOMs prepared by using 10  $\mu\text{L}$  of MPTMS.

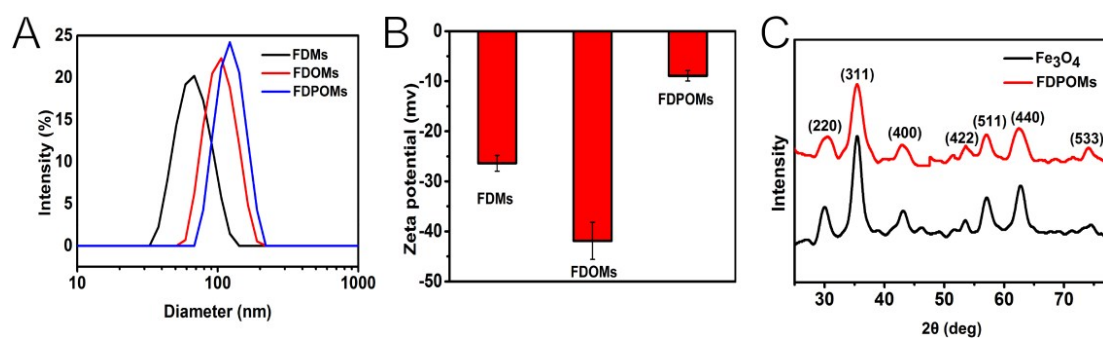

**Fig. S11.** (A) Size distributions and (B) Zeta potentials of FDMs, FDOMs and FDPOMs in water. (C) XRD patterns of Fe<sub>3</sub>O<sub>4</sub> nanoparticles and FDPOMs.

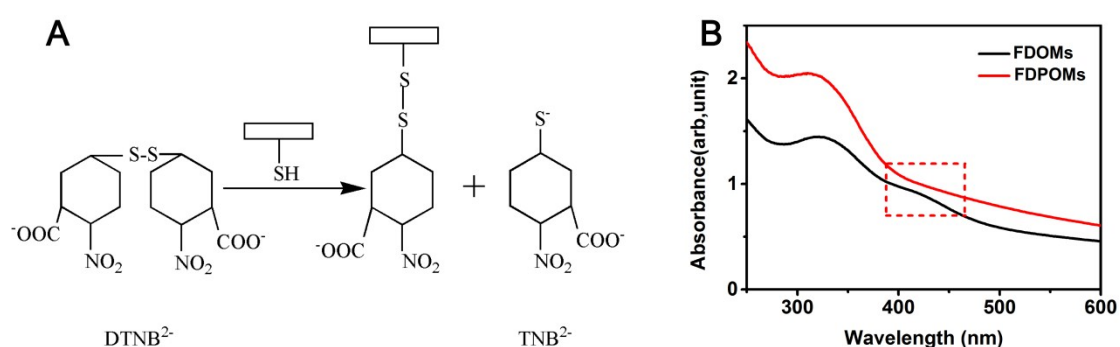

**Fig. S12.** (A) Schematic illustration of the reaction between Ellman's reagent and thiols. (B) UV-vis spectra of Ellman's reagent mixed with FDOMs and FDPOMs, respectively.

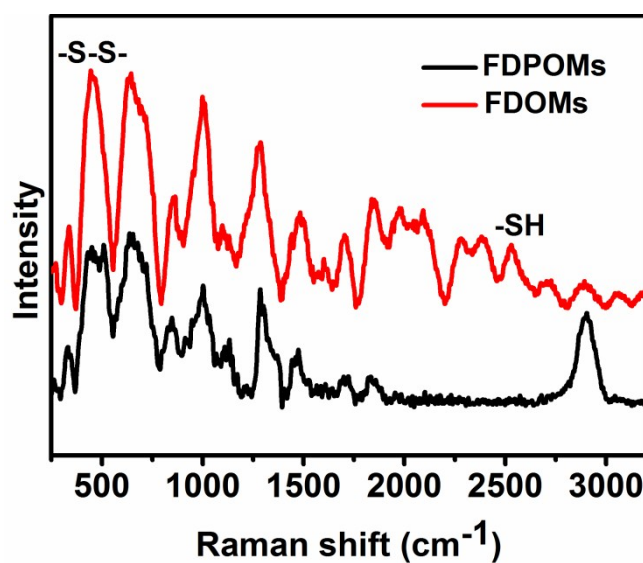

**Fig. S13.** Raman spectra of FDOMs and FDPOMs.

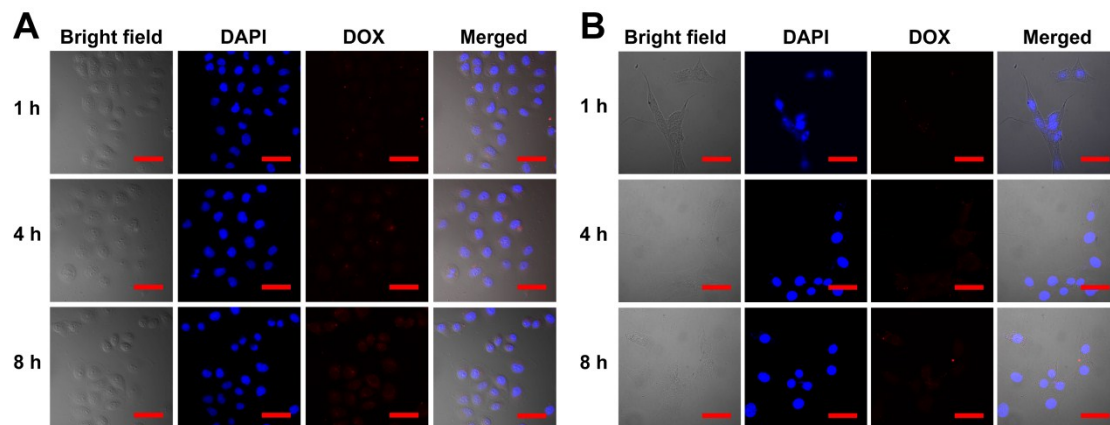

**Fig. S14.** CLSM images of intracellular DOX for (A) SMMC-7721 cancer cells and (B) 3T3 normal cells incubated with FDPOMs for 1, 4, and 8 h. The scale bars are 50  $\mu\text{m}$ .

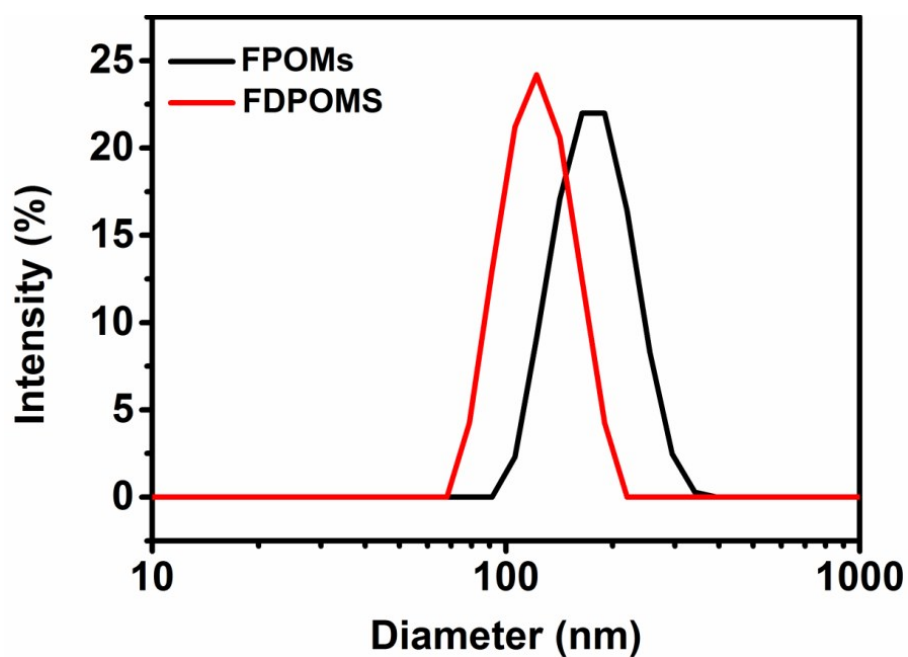

**Fig. S15.** Dynamic-diameters distributions of FPOMs and FDPOMs in water.

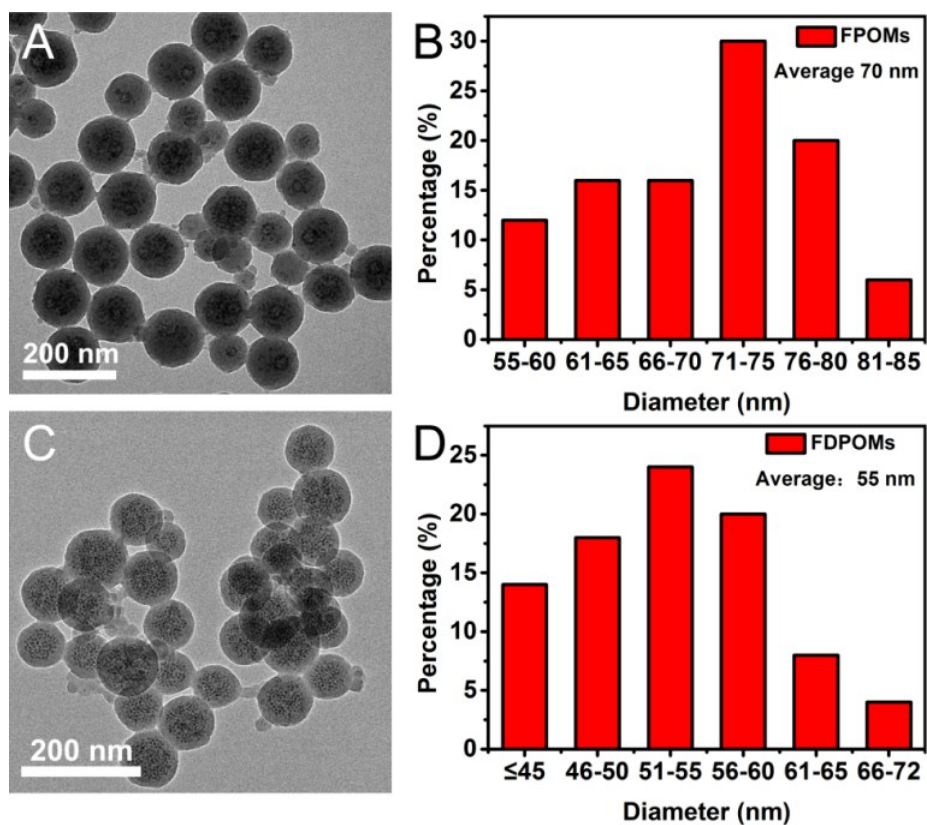

**Fig. S16.** TEM images (A, C) of FPOMs and FDPOMs and corresponding size distributions (B, D) of magnetic clusters by measuring 50 particles from TEM images of FPOMs and FDPOMs.

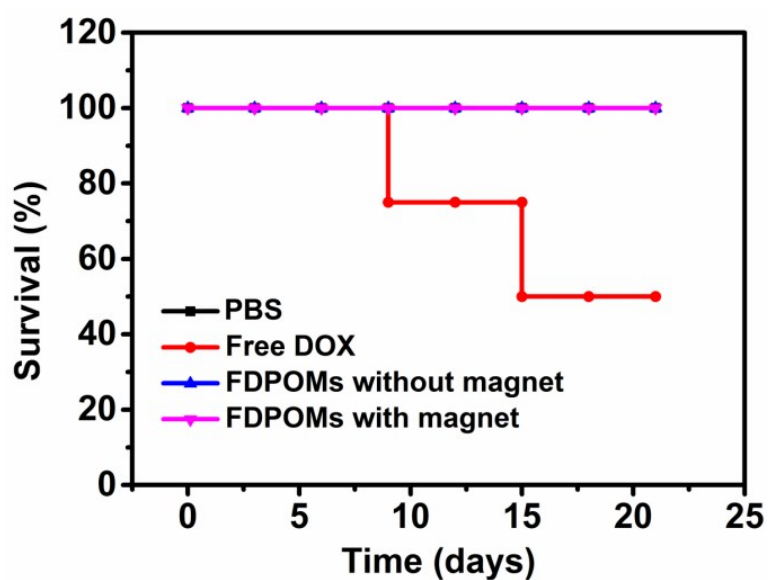

**Fig. S17.** Survival rates of SMMC-7721 tumor-bearing mice after intravenous injection of different formulations.

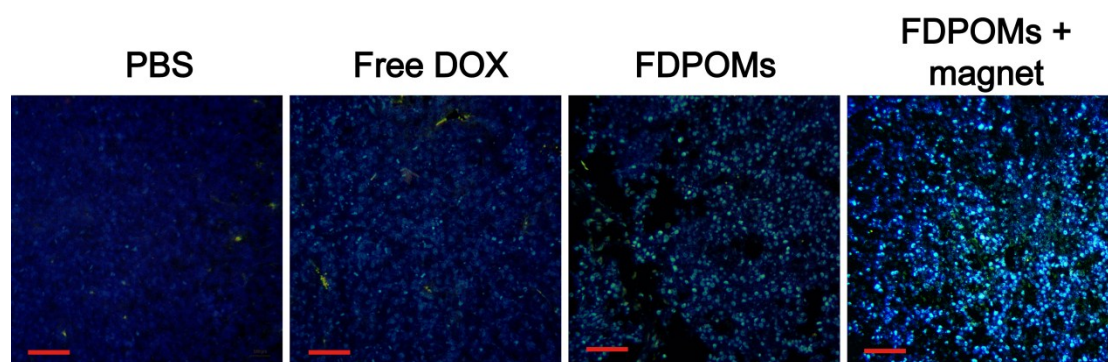

**Fig. S18.** TUNEL immunofluorescence staining images of tumor slices from mice treated with PBS, free DOX and FDPOMs with or without magnet. The scale bars are 200  $\mu\text{m}$ .
